# Supplementary material for: Changes of microbial and metabolome of the equine hindgut during oligofructose-induced laminitis
Source: PubMed Central journal article supplement (PMC7789226; doi:10.1186/s12917-020-02686-9), 2021-01-06

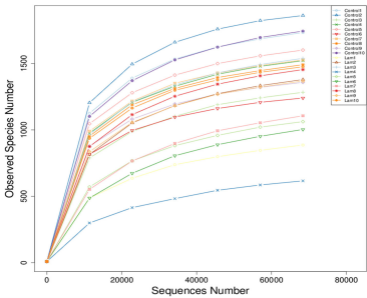

Supplement: 12917_2020_2686_MOESM4_ESM.pdf [file 12917_2020_2686_MOESM4_ESM.pdf]
